# Supplementary material
Source: Springer Nature journal article supplement (https://www.springermedizin.de/resource/supplementary/13256_2009_1227_MOESM1_ESM.pdf/9647288)

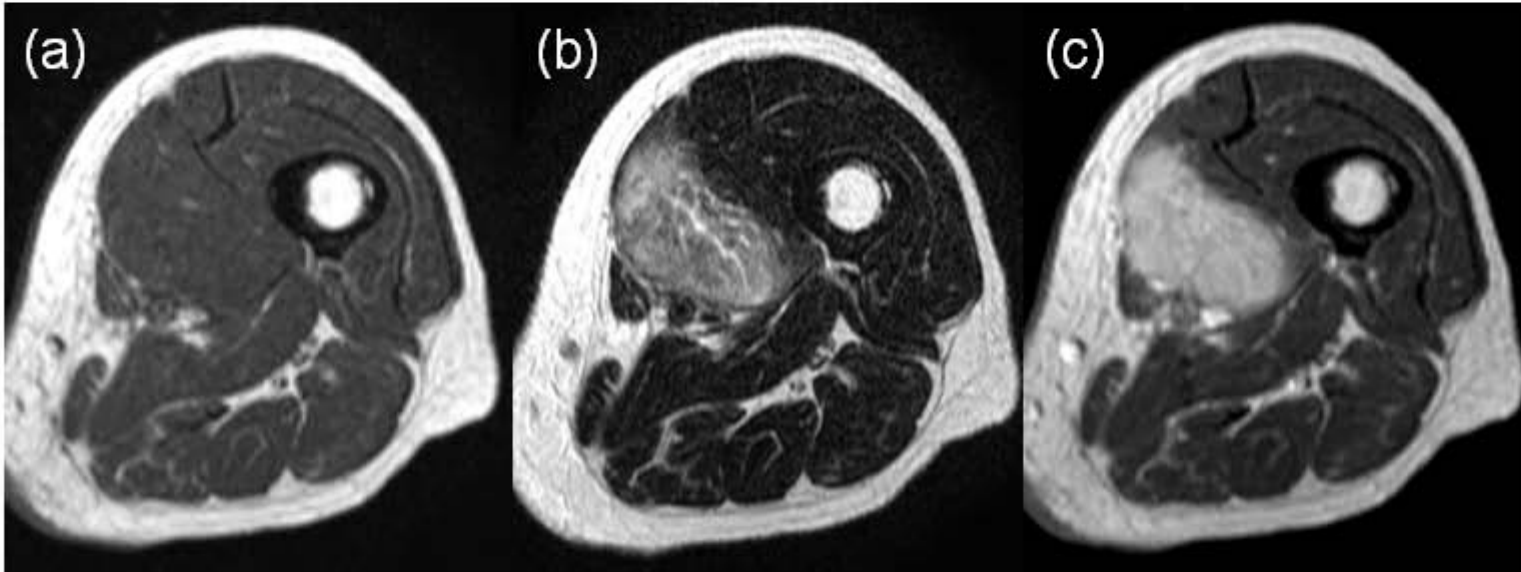

Supplement: MOESM1 [file 9647288]
